# Supplementary material
Source: HighWire-hosted journal article supplement (https://cmaj.ca/content/suppl/2007/08/30/177.5.484)
Supplement: hpv-lipp-f.pdf [file hpv-lipp-f.pdf]

## Recherche

# Virus du papillome humain, vaccins et santé des femmes : questions et avertissements

Abby Lippman PhD, Ryan Melnychuk PhD, Carolyn Shimmin BJ, Madeline Boscoe inf. DU

Le gouvernement fédéral a annoncé récemment un investissement de 300 millions de dollars dans un programme visant à vacciner les jeunes filles et les femmes au moyen du Gardasil, vaccin actuellement disponible contre le virus du papillome humain (VPH) que certains considèrent comme un moyen de prévenir le cancer du col au Canada. L'annonce a été en général bien accueillie par un vaste éventail de commentateurs. Même s'il faut qu'il y ait infection par le VPH pour que le cancer du col fasse son apparition et même si le vaccin peut prévenir l'infection primaire par les types 16 et 18 du VPH (qui, croit-on actuellement, causent environ 70 % des cas de cancer du col<sup>1</sup>), nous proposons qu'on évalue ces faits dans un contexte plus large avant de mettre en œuvre des politiques sur l'immunisation. Une recension minutieuse des textes, y compris ceux qu'a présentés le fabricant avec sa demande d'approbation du Gardasil, révèle qu'il reste suffisamment de questions sans réponse pour nous amener à conclure qu'un programme d'immunisation universel des jeunes filles et des femmes du Canada est prématuré pour le moment et qu'il pourrait avoir des conséquences négatives inattendues pour des personnes et pour la société en général.

Dans cet article, nous résumons certaines des principales questions et préoccupations auxquelles il faut répondre avant d'appliquer un programme général de vaccination contre le VPH (pour consulter d'autres documents, voir [www.cwhn.ca/resources/cwhn/hpv-brief.html](http://www.cwhn.ca/resources/cwhn/hpv-brief.html)). Ces questions et ces préoccupations reflètent fidèlement les enjeux soulevés dans le cadre analytique créé par Erickson et ses collaborateurs<sup>2</sup> dans le contexte de l'élaboration de la Stratégie nationale de promotion de la vaccination et des efforts de soutien visant à garantir qu'on évaluera complètement et systématiquement tous les facteurs pertinents avant de prendre des décisions sur la mise en œuvre d'un nouveau programme d'immunisation. Elles reprennent en outre certaines des questions de recherche jugées importantes dans le rapport final de l'Atelier sur les priorités canadiennes en matière de recherche sur les vaccins contre le virus du papillome humain qui a eu lieu à Québec en 2005<sup>3</sup>. Nous espérons qu'en soulevant ces questions maintenant, nous contribuerons aux délibérations nécessaires pour garantir un processus responsable et transparent de prise de décisions factuelles.

DOI:

## Questions et avertissements généraux

- Il n'y a pas d'épidémie du cancer du col au Canada qui justifie que l'on croie avoir besoin de toute urgence d'un programme de vaccination à la suite de l'annonce du ministre fédéral des Finances. Selon les statistiques canadiennes sur le cancer de 2006<sup>4</sup>, le cancer du col vient au 11<sup>e</sup> rang pour la fréquence des cancers touchant les femmes du Canada et au 13<sup>e</sup> comme cause de décès reliés au cancer : il cause environ 400 morts par année. L'incidence et le caractère mortel du cancer du col sont tous deux à la baisse au Canada comme dans d'autres pays riches en ressources, même si le fléchissement a ralenti un peu récemment par rapport aux décennies précédentes<sup>5</sup>. L'incidence et le taux de mortalité varient toutefois toujours entre différents groupes de femmes et sont particulièrement plus élevés chez les femmes autochtones.
- Le cancer du col envahissant suit habituellement une évolution lente qu'il est possible de bloquer à divers stades. La dégringolade spectaculaire du nombre de décès attribuables au cancer du col au Canada, même avant la mise au point de tout vaccin, représente une réussite en santé publique (Figure 1). La recherche l'attribue à une amélioration des méthodes de santé de la reproduction et à la disponibilité générale de programmes de tests de Papanicolaou financés par le secteur public<sup>6</sup>. En fait, le financement public de ces programmes a aussi aplani considérablement les injustices entre les femmes sur le plan de la santé<sup>6</sup>. Il faut donc considérer les décès attribuables au cancer du col — relativement rares au Canada, mais toujours malheureux et non répartis également entre les femmes — comme un manque de soutien adéquat des services tant de soins primaires que de santé de la reproduction qui garantirait des conditions de vie saines pour toutes les femmes. Des améliorations s'imposent en l'occurrence et il faut prendre des mesures pour garantir que

Abby Lippman est au Département d'épidémiologie, biostatistique et santé au travail de l'Université McGill, Montréal (Québec) et au Réseau canadien pour la santé des femmes. Ryan Melnychuk est au Département de bioéthique de l'Université Dalhousie, Halifax (NÉ). Carolyn Shimmin est au Réseau canadien pour la santé des femmes, Winnipeg (Man.). Madeline Boscoe est à la Clinique de santé des femmes, Winnipeg (Man.).

Les opinions exprimées dans le contenu rédactionnel du *JAMC* sont celles des auteurs et ne sont pas nécessairement celles de l'Association médicale canadienne.

toutes les femmes se soumettent au test de Pap et bénéficieront des suivis appropriés.

- La plupart des infections par le VPH se résorbent spontanément. De récentes recherches effectuées au moyen des technologies disponibles de détection moléculaire indiquent qu'il y a clairance dans l'année chez environ 70 % des femmes infectées et dans les deux ans chez 90 % d'entre elles<sup>7</sup>. Il faut donc éviter d'apparier l'infection par le VPH et le cancer du col : la plupart des femmes infectées même par une souche à risque élevé de VPH n'auront pas le cancer du col<sup>8</sup>. Il n'y a malheureusement pas de données sur les taux de clairance chez les jeunes filles, ni même sur les taux réels de prévalence du VPH chez les adolescents et les enfants, mais il s'agit là de renseignements critiques si l'on veut élaborer des propositions de politique et les évaluer par la suite.
- La nature d'un programme de vaccination dépend obligatoirement de la définition de buts clairs et tangibles. Jusqu'à maintenant, on n'a pas établi de tels buts clairs en ce qui a trait à une initiative canadienne. Le programme de vaccination vise-t-il à éliminer dans la population les types de VPH à risque élevé? Ou vise-t-il plutôt à réduire le nombre de décès attribuables au cancer du col? Il faut des stratégies différentes pour atteindre ces objectifs différents. L'éradication des agents pathogènes, par exemple, sous-entendrait un objectif d'immunité collective, ce qui pourrait obliger à vacciner les garçons et les jeunes hommes. Par contre, si l'on veut réduire le nombre de décès causés par le cancer du col, il faudrait un vaccin contre plus que les deux types de VPH à risque élevé qui causent un peu plus des deux tiers des cas de cancer du col.
- L'information sur l'efficacité du Gardasil est toujours in-

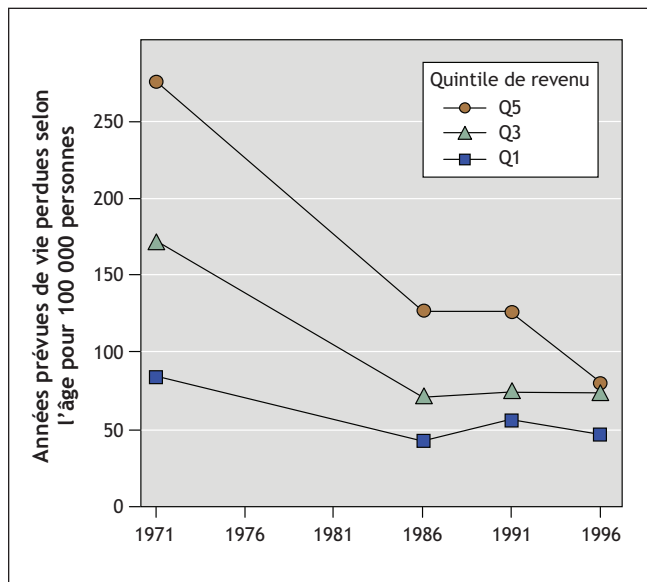

**Figure 1 :** Mortalité évitable (années prévues de vie perdues selon l'âge pour 100 000 personnes) attribuable au cancer du col au Canada de 1971 à 1996, selon le quintile de revenu. Reproduit avec la permission de James et al<sup>6</sup>. Droit d'auteur © 2007, BMJ Publishing Group Ltd.

certaine. Son efficacité dans le monde réel est encore moins claire. Jusqu'à maintenant, on a signalé une poignée seulement d'essais contrôlés randomisés de qualité suffisante pour justifier une critique systématique<sup>9</sup>. Chacun des essais de vaccins contre le VPH qui a fait l'objet d'un rapport, qu'il s'agisse du Gardasil ou de son concurrent éventuel, le Cervarix, a été financé en totalité ou en partie par le fabricant du vaccin, ce qui est intéressant. Même si Rambout et ses collaborateurs<sup>9</sup> signalent dans leur critique systématique (voir page 469) que dans l'ensemble, le vaccin est très efficace à court terme, particulièrement lorsque l'on met en commun tous les résultats cliniques, ils ajoutent que certaines faiblesses méthodologiques que présentent les rapports d'essais, conjuguées aux limites des données actuellement disponibles, laissent toujours de nombreuses lacunes sur le plan de l'information. Ce n'est pas inusité à ce point de convergence de la mise au point de nouveaux produits pharmaceutiques, mais cela indique toutefois qu'il faut éviter de décrire les avantages de façon excessivement optimiste et d'atténuer les risques possibles.

- Nous ajouterions des questions à celles que soulèvent Rambout et ses collaborateurs. Plus précisément, pendant combien de temps dure la protection immunologique conférée par le vaccin contre les types 16 et 18 du VPH? Faudra-t-il des vaccins de rappel pour maintenir cette couverture limitée et, le cas échéant, quand? Toute question sur l'efficacité porte sur les préoccupations soulevées par la possibilité que l'immunité à court terme modifie l'évolution naturelle de l'infection virale comme cela semble être le cas de la varicelle : la protection a duré moins longtemps que prévu et les infections virales chez les personnes âgées sont plus sévères que chez les enfants<sup>10</sup>.
- Nous manquons de plus de données sur l'efficacité du vaccin contre le VPH lorsqu'il est administré en même temps que d'autres vaccins, comme cela peut se produire dans la réalité. En outre, des facteurs comme l'alimentation d'une personne, son statut de fumeur et son état de santé général (p. ex., comorbidités) auront-ils un effet sur l'innocuité ou l'utilité du vaccin contre le VPH? Il y a peut-être encore plus important : des malentendus au sujet de ce que le vaccin fait et ne fait pas pourraient-ils entraîner des réductions des pratiques sexuelles sécuritaires et des taux des tests de Pap pour le dépistage? Ces questions sont au nombre de celles que les participants ont soulevées au cours de l'atelier sur les priorités de recherche qui s'est tenu à Québec en novembre 2005. Elles demeurent pertinentes — et toujours sans réponse.
- Il y a relativement peu de jeunes filles (environ 1200 âgées de 9 à 15 ans) qui ont participé aux essais cliniques portant sur le Gardasil et l'on a suivi les plus jeunes d'entre elles pendant 18 mois seulement<sup>11</sup>. Si l'on suppose qu'elles n'ont pas encore été exposées au VPH, les jeunes filles de ce groupe d'âge constituent la population cible prioritaire d'un programme de vaccination générale. Il est clair qu'il s'agit là d'une base d'information plutôt mince sur laquelle fonder une politique de vaccination collective pour toutes les jeunes filles âgées de 9 à 13 ans, comme le

recommande le Comité consultatif national de l'immunisation<sup>1</sup>.

- Le Gardasil est le vaccin pour enfant le plus coûteux que l'on propose d'utiliser de façon générale : les trois doses obligatoires coûtent actuellement 404 \$. Or, on n'a pas effectué les analyses de rentabilité des programmes de vaccination proposés qui sont nécessaires pour évaluer cette dépense. À cause du manque de données sur l'efficacité, il est difficile d'estimer la réduction du nombre d'exams répétitifs ou de coloscopies que l'on peut prévoir pour équilibrer certains des coûts de la vaccination et l'on ne peut déterminer si celle-ci aura une « valeur ajoutée ». Même si elles sont vaccinées, les jeunes filles et les femmes devront toujours pratiquer une sexualité protégée et avoir accès à des programmes existants de tests de dépistage de Pap, ainsi qu'à d'autres soins de santé de la reproduction. Il faut aussi analyser les coûts possibles d'opportunités perdues et évaluer l'effet qu'aura sur d'autres priorités en matière de soins de santé l'affectation de ressources limitées aux programmes de vaccination contre le VPH.

## Recommandations générales

Nous proposons des recommandations générales dont il faudrait tenir compte avant d'établir et de mettre en œuvre un programme universel de vaccination contre le VPH (Encadré 1).

Soyons clairs : si les données montrent qu'il est possible de lancer avec succès au Canada un programme de vaccina-

### Encadré 1 : Recommandations générales sur l'élaboration d'un programme de vaccination générale contre l'infection par le virus du papillome humain (VPH)

- Les gouvernements devraient commencer immédiatement à informer le public au sujet des réalités du cancer du col, de l'infection par le VPH et des vaccinations contre le VPH en insistant sur l'importance des comportements personnels et sexuels sains, de la bonne nutrition, de l'abandon du tabac, des tests de Papanicolaou périodiques et du dépistage des infections transmises sexuellement.
- Il faut revoir les politiques fédérales, provinciales et territoriales sur les soins de santé de la reproduction afin d'évaluer le rôle de tout programme de vaccination dans le contexte des services existants de prévention et de traitement du cancer du col.
- Il faut définir les objectifs de tout programme éventuel de vaccination générale afin de garantir qu'on utilise à ces fins le vaccin le plus efficace et le plus sécuritaire dans les populations appropriées.
- Les gouvernements doivent appuyer la recherche impartiale, sans aucun conflit d'intérêts, afin de recueillir les données qui manquent actuellement mais qui sont essentielles à l'élaboration de politiques factuelles et à la prise de décision sur les soins de santé. Cette recherche doit inclure des études visant à évaluer l'effet possible de la vaccination sur les pratiques sexuelles plus sécuritaires, sur l'accès aux services de santé de la reproduction et sur les coûts possibles d'opportunités perdues.

tion contre le VPH et lorsqu'elles le feront, le programme devra être financé par le secteur public. Le manque de ressources financières ne doit pas empêcher une seule jeune fille ou femme de recevoir un vaccin approuvé par les dirigeants de la santé. Dans les préoccupations soulevées par la façon dont les fonds publics servent à promouvoir et protéger la santé des jeunes filles et des femmes, il faut toutefois tenir compte d'enjeux de plus grande envergure comme les besoins des groupes marginalisés et les plus vulnérables de la société. L'aide gouvernementale aux programmes de vaccination contre le VPH ne doit toutefois pas perpétuer les injustices qui existent sur le plan de la santé. Ces programmes doivent plutôt niveler ces injustices par des approches factuelles intégrées et réfléchies qui permettent aux personnes les plus à risque d'en bénéficier.

Pour promouvoir et protéger le plus efficacement possible la santé des femmes et prévenir des décès causés par le cancer du col au Canada, il ne faut pas nous concentrer seulement sur un programme universel de vaccination contre le VPH au moment où il est urgent de répondre rapidement et clairement aux nombreuses questions soulevées dans cet article.

Le Gardasil représente le premier de vaccins contre les souches de VPH à risque élevé qui deviendront probablement nombreux et ce que nous ferons maintenant établira un précédent pour ceux qui suivront. Un programme fructueux de vaccination doit reposer sur une recherche factuelle solide et nous avons maintenant la possibilité intéressante de terminer ce travail et d'établir un modèle de programme actuel et futur de vaccination contre le VPH comportant des résultats sanitaires clairement définis et quantifiables. Il faut être certain que le fait de consacrer quelque 2 milliards de dollars à la vaccination d'une population de jeunes filles et de femmes du Canada, qui sont déjà pour la plupart bien protégées par leur propre système immunitaire, des pratiques sexuelles sécuritaires et des programmes de dépistage existants, ne perpétuera pas des écarts qui existent actuellement sur le plan des soins et ne laissera inchangé le taux réel de mortalité attribuable au cancer du col. L'apparition d'effets iatrogènes comme une augmentation des taux de cancer du col serait encore pire si un faux sentiment de sécurité incitait les jeunes filles et les femmes à cesser de se soumettre à des tests périodiques de dépistage de Pap et à considérer la vaccination comme une solution simple.

Dans l'élaboration d'un programme type de vaccination contre le VPH, les gouvernements devraient commencer par informer le public au sujet de la réalité que constituent le cancer du col, l'infection à VPH et les vaccinations afin de dissiper les inquiétudes soulevées par le cancer du col et le VPH et de mettre l'accent sur l'importance d'habitudes personnelles saines, y compris l'utilisation de méthodes à barrière, une bonne alimentation, l'abandon du tabac, des tests périodiques de Pap, sans oublier le dépistage des infections transmises sexuellement. Il faudrait aussi revoir les politiques fédérales, provinciales et territoriales sur les soins de santé de la reproduction, et notamment évaluer la place de tout programme de vaccination dans le contexte des services existants de prévention et de prise en charge du cancer du col.

Il faudra dans ce dernier cas définir les buts de tout pro-

gramme éventuel de vaccination généralisée. Si l'on vise à réduire le nombre de cas de cancer du col, il faudrait envisager de favoriser des vaccins sécuritaires et efficaces qui couvrent un vaste éventail de souches virales à risque élevé. Si l'on veut éliminer les infections à VPH, il est alors essentiel de disposer de données sur la façon d'inclure les garçons et les hommes, ainsi que les jeunes filles et les femmes, et de gérer des types de VPH oncogènes nouvellement identifiés dans le contexte d'un programme d'immunisation. Les comparaisons directes de différents vaccins réalisées dans le contexte de programmes de recherche impartiaux ne comportant aucun conflit d'intérêts seront des plus utiles en l'occurrence afin de réunir des données servant à l'élaboration de politiques factuelles et à la prise de décisions sur les soins de santé.

Le Canada dispose déjà de cadres réfléchis et utiles pour l'élaboration de politiques sur la vaccination et la prévention du cancer. Il est urgent de les appliquer pour réunir et évaluer les données scientifiques (moléculaires, épidémiologiques, immunologiques) et sociales qui ont trait aux vaccins contre le VPH et pour évaluer les avantages et les préjudices possibles qui pourraient découler d'une immunisation généralisée au moyen du vaccin contre le VPH avant que les gouvernements affectent à de tels programmes des sommes énormes tirées des enveloppes budgétaires déjà limitées des soins de santé. Le moment est venu de faire une pause, de réfléchir sur ce que nous savons et ne savons pas, et d'élaborer un plan fondé sur des données fiables et solides qui ajoutent de la valeur pour tous. Les jeunes filles et les femmes individuellement, ainsi que les décideurs, pourront prendre des décisions vraiment éclairées sur la vaccination seulement lorsqu'ils auront toutes les données probantes. Aujourd'hui, il y a plus de questions que de réponses.

Cet article a été critiqué par des pairs.

**Intérêts concurrents :** Aucun déclaré.

**Remerciements :** Nous remercions Judy Norsigian, Robin Barnett et Hans Krueger, ainsi que les membres d'Action pour la protection de la santé des femmes, de leurs contributions réfléchies.

Tous les auteurs sont membres du Groupe de rédaction du Réseau canadien pour la santé des femmes, ont collaboré avec ces personnes et groupes

et d'autres intervenants au cours de la production du document et ont partagé des textes avec eux. Action pour la protection de la santé des femmes et le Réseau canadien pour la santé des femmes bénéficient tous deux de l'appui du Programme de contribution pour la santé des femmes de Santé Canada. Les opinions exprimées dans cet article sont celles des auteurs et pas nécessairement celles de Santé Canada.

## RÉFÉRENCES

1. Comité consultatif national de l'immunisation. Déclaration sur le vaccin contre le virus du papillome humain. *Relevé des maladies transmissibles au Canada* 2007;33(DCC-2):1-31. Disponible : [www.phac-aspc.gc.ca/publicat/ccdr-rmtc/07pdf/acs33-02.pdf](http://www.phac-aspc.gc.ca/publicat/ccdr-rmtc/07pdf/acs33-02.pdf) (consulté le 17 juillet 2007).
2. Erickson LJ, De Wals P, Farand L. An analytical framework for immunization programs in Canada. *Vaccine* 2005;23:2470-6.
3. Agence de la santé publique du Canada. Atelier sur les priorités canadiennes en matière de recherche sur les vaccins contre le virus du papillome humain : Rapport final. *Relevé des maladies transmissibles au Canada* 2006;32S1:1-66. Disponible : [www.phac-aspc.gc.ca/publicat/ccdr-rmtc/06vol32/32s1/index.html](http://www.phac-aspc.gc.ca/publicat/ccdr-rmtc/06vol32/32s1/index.html) (consulté le 17 juillet 2007).
4. Société canadienne du cancer et Institut national du cancer du Canada. *Statistiques canadiennes sur le cancer 2006*. Toronto : L'Institut; 2006.
5. Sellors JW, Lytwyn A. Virus du papillome humain. [Dans : Objectifs nationaux en matière de prévention et de contrôle des maladies transmissibles sexuellement au Canada.] *Relevé des maladies transmissibles au Canada*. Nov. 1997; 23S6. Disponible : [www.phac-aspc.gc.ca/publicat/ccdr-rmtc/97vol23/23s6nat/23s6g\\_f.html](http://www.phac-aspc.gc.ca/publicat/ccdr-rmtc/97vol23/23s6nat/23s6g_f.html) (consulté le 17 juillet 2007).
6. James PD, Wilkins R, Detsky AS, et al. Avoidable mortality by neighbourhood income in Canada: 25 years after the establishment of universal health insurance. *J Epidemiol Community Health* 2007;61:287-96.
7. Prise en charge et traitement d'infections spécifiques : Infections génitales au virus du papillome humain (VPH). Dans : *Lignes directrices canadiennes sur les infections transmises sexuellement, Édition 2006*. Ottawa : Agence de la santé publique du Canada; 2006. Disponible : [www.phac-aspc.gc.ca/std-mts/sti\\_2006/sti\\_intro2006\\_f.html](http://www.phac-aspc.gc.ca/std-mts/sti_2006/sti_intro2006_f.html) (consulté le 23 juillet 2007).
8. Agence de la santé publique du Canada. Ce qu'il faut savoir sur le virus du papillome humain (VPH) : Questions et réponses. Disponible : [www.phac-aspc.gc.ca/std-mts/hpv-vph/hpv-vph-qaqr\\_f.html](http://www.phac-aspc.gc.ca/std-mts/hpv-vph/hpv-vph-qaqr_f.html) (consulté le 17 juillet 2007).
9. Rambout L, Hopkins L, Hutton B, et al. Prophylactic vaccination against human papillomavirus infection and disease in women: a systematic review of randomized controlled trials. *JAMA* 2007;177:469-79.
10. Chaves SS, Gargiullo P, Zhang JX, et al. Loss of vaccine-induced immunity to varicella over time. *N Engl J Med* 2007;356:1121-9.
11. Rabin R. A new vaccine for girls: But should it be compulsory? *New York Times* 18 juillet 2007. Disponible : <http://query.nytimes.com/gst/fullpage.html?sec=health&res=9E06E7DF163FF93BA25754C0A9609C8B63> (consulté le 23 juillet 2007).

**Correspondance :** D<sup>r</sup> Abby Lippman, Département d'épidémiologie, biostatistique et santé au travail, Université McGill, 1020, avenue des Pins ouest, Montréal (QC) H3A 1A2; téléc. 514 398-4503; [abby.lippman@mcgill.ca](mailto:abby.lippman@mcgill.ca)
